# Supplementary material
Source: PubMed Central journal article supplement (PMC8916982)
Supplement: NIHMS1772375-supplement-1.pdf [file NIHMS1772375-supplement-1.pdf]

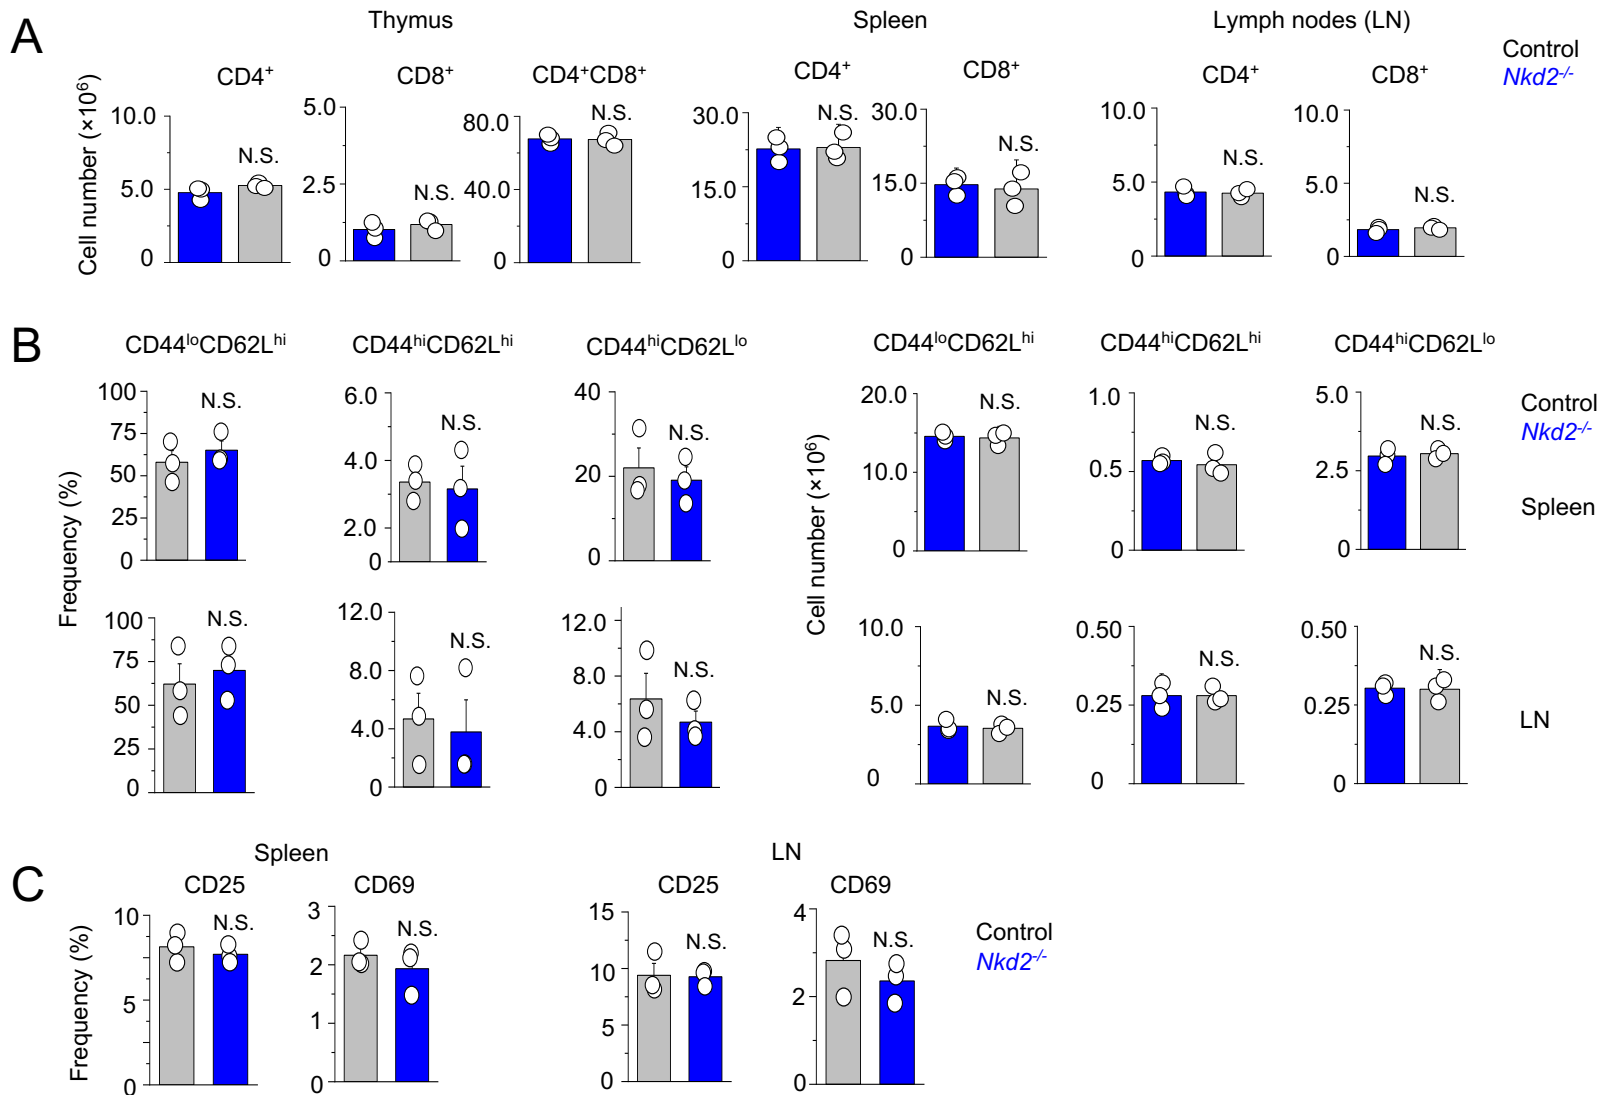

**Suppl. Figure 1. Normal numbers and basal activation of T cells in *Nkd2* knockout mice**

(A) Numbers of T cells in the thymus, spleen, and lymph nodes (LN) of control and *Nkd2*<sup>-/-</sup> mice.

(B) Frequencies and numbers of naïve, central-, and effector- memory CD4<sup>+</sup> T cell populations in the spleen and lymph nodes of control and *Nkd2*<sup>-/-</sup> mice as judged by surface staining for CD62L and CD44 markers.

(C) Expression of CD25 and CD69 among CD4<sup>+</sup> T cell populations in the spleen and lymph nodes of control and *Nkd2*<sup>-/-</sup> mice.

Each symbol represents data obtained from an independent animal. N.S., not significant

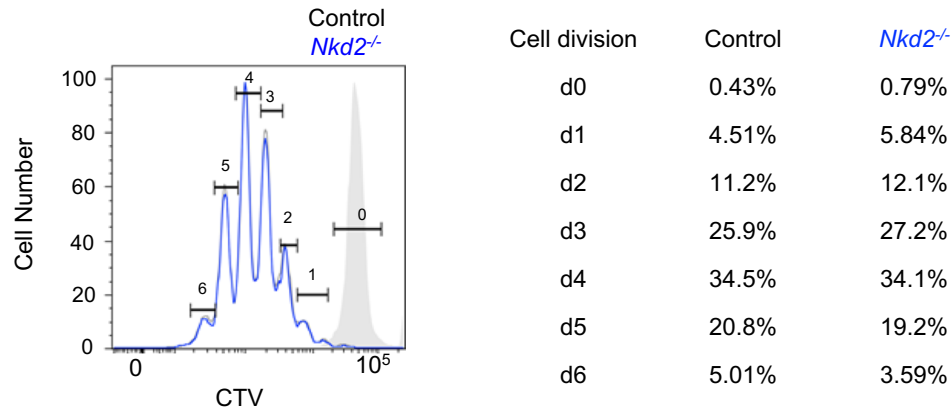

**Suppl. Figure 2. Normal proliferation of *Nkd2* knockout T cells**

CTV-labelled control and *Nkd2*<sup>-/-</sup> naïve T cells were cultured under non-polarizing conditions for 4 days and examined for proliferation by flow cytometry (left). Frequencies of each division from one representative experiment are shown (right). Unstimulated cells were used as a control for division 0 (colored in gray).

**Table S1.**

List of all the primers used for quantitative RT-PCR in this study.

| <b>Clone name</b>    | <b>Forward primer</b>             | <b>Reverse primer</b>              |
|----------------------|-----------------------------------|------------------------------------|
| mNKD2                | GAT GCC TCT GTC AAT CAC TCC       | TCA ATC TCT GTT CTG CCA CG         |
| mCCR5                | CGA AAA CAC ATG GTC AAA CG        | TTC CTA CTC CCA AGC TGC AT         |
| mCXCR3               | TGC TAG ATG CCT CGG ACT TT        | ATA AGA CGG ATG GCC TTG TG         |
| mIntegrin $\alpha$ L | CCA GAC TTT TGC TAC TGG GAC       | GCT TGT TCG GCA GTG ATA GAG        |
| mCCR6                | CCT CAC ATT CTT AGG ACT GGA GC    | GGC AAT CAG AGC TCT CGG A          |
| mIL-23R              | ACA CTG GGA AGC CTA CCT ACA       | AGC TTG GAC CCA TAC CAA ATA        |
| mIL-10               | CCC TTT GCT ATG GTG TCC TT        | TGG TTT CTC TTC CCA AGA GC         |
| mGM-CSF              | TTT ACT TTT CCT GGG CAT TG        | TAG CTG GCT GTC ATG TTC AA         |
| mGATA-3              | CTC GGC CAT TCG TAC ATG GAA       | GGA TAC CTC TGC ACC GTA GC         |
| mIFN- $\gamma$       | ACT GGC AAA AGG ATG GTG           | GTT GCT GAT GGC CTG ATT            |
| mT-bet               | CAA CAA CCC CTT TGC CAA AG        | TCC CCC AAG CAG TTG ACA GT         |
| mIL-17A              | CTC CAG AAG GCC CTC AGA CTA       | AGC TTT CCC TCC GCA TTG ACA        |
| mIL-17F              | CCC ATG GGA TTA CAA CAT CAC       | CAC TGG GCC TCA GCG ATC            |
| mROR $\gamma$        | CAC GGC CCT GGT TCT CAT           | CAG ATG TTC CAC TCT CCT CTT CTC T  |
| mROR $\alpha$        | TCT CCC TGC GCT CTC CGC AC        | TCC ACA GAT CTT GCA TGG A          |
| mIntegrin $\alpha$ 4 | GAT GCT GTT GTT GTA CTT CGG       | ACC ACT GAG GCA TTA GAG AGC        |
| mTCF-7               | GCC AGA AGC AAG GAG TTC AC        | ACT GGG CCA GCT CAC AGT AT         |
| mRunx1               | ACT TCC TCT GCT CCG TGC TA        | CGC GGT AGC ATT TCT CAG TT         |
| mRunx3               | GCC GGC AAT GAT GAG AAC TA        | TCC ATC CAC AGT GAC CTT GA         |
| mGAPDH               | TGG AGA TTG TTG CCA TCA ACG ACC C | TAG ACT CCA CGA CAT ACT CAG CAC CG |
| m36B4                | AGA TTC GGG ATA TGC TGT TGG C     | TCG GGT CCT AGA CCA GTG TTC        |
